# Supplementary material for: Amino acid composition predicts prion activity
Source: PubMed Central journal article supplement (PMC5402983; doi:10.1371/journal.pcbi.1005465), 2017-04-10
Supplement: pcbi.1005465.s001.pdf [file pcbi.1005465.s001.pdf]

# Amino Acid Composition Predicts Prion Activity

## Supplementary Information

Fayyaz ul Amir Afsar Minhas, Eric D. Ross, and Asa Ben-Hur

### Accuracy of pWALTZ-like scoring without pre-filtering

In Table 1 in the paper we provided results on pWALTZ-like scoring with pre-filtering using FoldIndex and Q/N composition. In the Table below we provide additional results without pre-filtering. This experiment was performed only on the Alberti dataset, since pWALTZ-like scoring is designed to be accurate only for Q/N rich proteins.

| <b>PSSM type</b>   | <b>AUC-ROC</b> | <b>AUC-PR</b> |
|--------------------|----------------|---------------|
| original PSSM      | 79.0           | 69.0          |
| scrambled PSSM     | 98.0           | 98.1          |
| scrambled hexamers | 96.2           | 96.8          |
| Scrambled domains  | 81.8           | 70.4          |

Table A: Results of pWALTZ-like scoring using only the PSSM. Accuracy is measured using the area under the ROC curve (AUC-ROC), and area under the precision-recall curve (AUC-PR).

## Supplemental ROC and PR curves

The figures below provide ROC and PR curves that correspond to the results reported in Tables 1 and 2 in the paper.

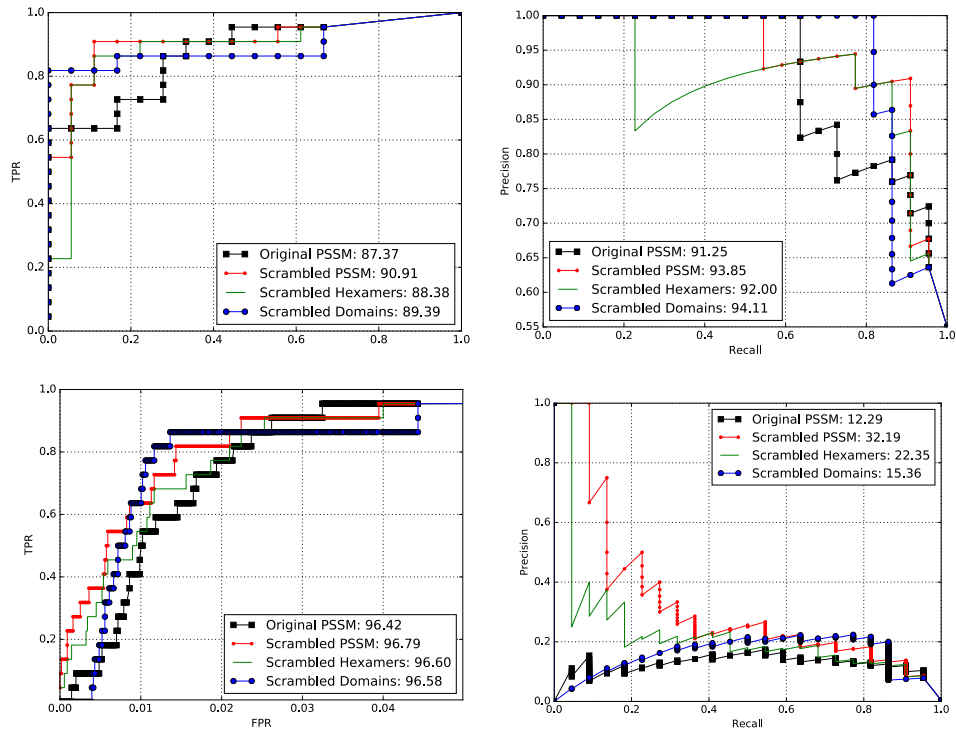

**Figure A: ROC and PR curves corresponding to Table 1.**

This figures provides the ROC curves (left) and PR curves (right) on the Alberti dataset (top) and the full yeast proteome (bottom) that correspond to the results provided in Table 1 in the paper.

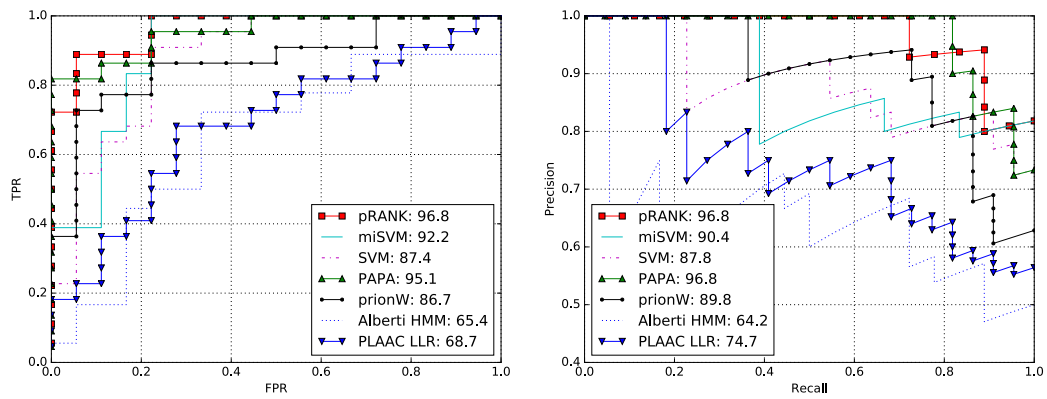

**Figure B: ROC and PR curves corresponding to Table 2.**

This figure provides the ROC curves (left) and PR curves (right) on the Alberti dataset that correspond to the results provided in Table 1 in the paper.

## Gene Ontology Results

Table B: GO molecular function reported by GOrilla for the 22 yeast prion proteins:

| GO Term    | Description                                    | P-value  | FDR q-value |
|------------|------------------------------------------------|----------|-------------|
| GO:0003676 | nucleic acid binding                           | 1.98E-05 | 4.65E-02    |
| GO:0005487 | nucleocytoplasmic transporter activity         | 2.92E-05 | 3.43E-02    |
| GO:0003729 | mRNA binding                                   | 4.85E-04 | 3.80E-01    |
| GO:1901363 | heterocyclic compound binding                  | 6.39E-04 | 3.75E-01    |
| GO:0097159 | organic cyclic compound binding                | 6.87E-04 | 3.23E-01    |
| GO:0001085 | RNA polymerase II transcription factor binding | 8.82E-04 | 3.46E-01    |

Table C: GO molecular function reported by GOrilla for the top 200 predictions made by pRANK:

| GO Term    | Description                                                                                                     | P-value  | FDR q-value |
|------------|-----------------------------------------------------------------------------------------------------------------|----------|-------------|
| GO:0001071 | nucleic acid binding transcription factor activity                                                              | 1.23E-19 | 2.89E-16    |
| GO:0003700 | transcription factor activity, sequence-specific DNA binding                                                    | 1.23E-19 | 1.44E-16    |
| GO:0000981 | RNA polymerase II transcription factor activity, sequence-specific DNA binding                                  | 2.01E-19 | 1.57E-16    |
| GO:0043565 | sequence-specific DNA binding                                                                                   | 3.78E-13 | 2.22E-10    |
| GO:0001228 | transcriptional activator activity, RNA polymerase II transcription regulatory region sequence-specific binding | 2.71E-11 | 1.28E-08    |
| GO:0001077 | transcriptional activator activity, RNA polymerase II core promoter proximal region sequence-specific binding   | 3.68E-11 | 1.44E-08    |
| GO:0003729 | mRNA binding                                                                                                    | 1.11E-10 | 3.74E-08    |
| GO:0000982 | transcription factor activity, RNA polymerase II core promoter proximal region sequence-specific binding        | 1.93E-10 | 5.66E-08    |
| GO:0001085 | RNA polymerase II transcription factor binding                                                                  | 2.54E-10 | 6.63E-08    |
| GO:0003676 | nucleic acid binding                                                                                            | 1.82E-09 | 4.28E-07    |
| GO:0000976 | transcription regulatory region sequence-specific DNA binding                                                   | 2.67E-08 | 5.70E-06    |
| GO:0005488 | binding                                                                                                         | 4.05E-08 | 7.94E-06    |
| GO:0044822 | poly(A) RNA binding                                                                                             | 7.20E-08 | 1.30E-05    |
| GO:0008134 | transcription factor binding                                                                                    | 9.82E-08 | 1.65E-05    |
| GO:1901363 | heterocyclic compound binding                                                                                   | 1.04E-07 | 1.64E-05    |
| GO:1990837 | sequence-specific double-stranded DNA binding                                                                   | 1.21E-07 | 1.78E-05    |
| GO:0001067 | regulatory region nucleic acid binding                                                                          | 1.29E-07 | 1.79E-05    |
| GO:0097159 | organic cyclic compound binding                                                                                 | 1.46E-07 | 1.91E-05    |
| GO:0000977 | RNA polymerase II regulatory region sequence-specific DNA binding                                               | 1.69E-07 | 2.09E-05    |
| GO:0001102 | RNA polymerase II activating transcription factor binding                                                       | 2.82E-07 | 3.32E-05    |

|            |                                                                                  |          |          |
|------------|----------------------------------------------------------------------------------|----------|----------|
| GO:0001012 | RNA polymerase II regulatory region DNA binding                                  | 3.39E-07 | 3.79E-05 |
| GO:0033613 | activating transcription factor binding                                          | 4.30E-07 | 4.60E-05 |
| GO:0000975 | regulatory region DNA binding                                                    | 5.32E-07 | 5.44E-05 |
| GO:0044212 | transcription regulatory region DNA binding                                      | 5.32E-07 | 5.22E-05 |
| GO:0001076 | transcription factor activity, RNA polymerase II transcription factor binding    | 6.82E-07 | 6.41E-05 |
| GO:0003677 | DNA binding                                                                      | 1.15E-06 | 1.04E-04 |
| GO:0000987 | core promoter proximal region sequence-specific DNA binding                      | 2.41E-06 | 2.10E-04 |
| GO:0001159 | core promoter proximal region DNA binding                                        | 2.85E-06 | 2.39E-04 |
| GO:0003690 | double-stranded DNA binding                                                      | 1.01E-05 | 8.22E-04 |
| GO:0001135 | transcription factor activity, RNA polymerase II transcription factor recruiting | 1.06E-05 | 8.27E-04 |
| GO:0000978 | RNA polymerase II core promoter proximal region sequence-specific DNA binding    | 1.22E-05 | 9.22E-04 |
| GO:0005515 | protein binding                                                                  | 2.76E-05 | 2.03E-03 |
| GO:0001134 | transcription factor activity, transcription factor recruiting                   | 4.05E-05 | 2.88E-03 |
| GO:0005487 | nucleocytoplasmic transporter activity                                           | 5.27E-05 | 3.64E-03 |
| GO:0000989 | transcription factor activity, transcription factor binding                      | 9.32E-05 | 6.26E-03 |
| GO:0004532 | exoribonuclease activity                                                         | 1.64E-04 | 1.07E-02 |
| GO:0016896 | exoribonuclease activity, producing 5'-phosphomonoesters                         | 1.64E-04 | 1.04E-02 |
| GO:0000988 | transcription factor activity, protein binding                                   | 3.99E-04 | 2.47E-02 |
| GO:0004535 | poly(A)-specific ribonuclease activity                                           | 4.09E-04 | 2.46E-02 |
| GO:0015616 | DNA translocase activity                                                         | 4.27E-04 | 2.51E-02 |
| GO:0008270 | zinc ion binding                                                                 | 5.54E-04 | 3.18E-02 |
| GO:0001103 | RNA polymerase II repressing transcription factor binding                        | 5.92E-04 | 3.31E-02 |
| GO:0000175 | 3'-5'-exoribonuclease activity                                                   | 8.32E-04 | 4.55E-02 |
